# Supplementary material for: Human CD45 is an F-component-specific receptor for the staphylococcal toxin Panton–Valentine leukocidin
Source: Springer Nature journal article supplement (doi:10.1038/s41564-018-0159-x), 2018-05-04
Supplement: MOESM3 [file 41564_2018_159_MOESM3_ESM%20(3).xlsx]

## Sheet: INDEX6_vs_INDEX7.gene_summary.t
	Gene	Score
	SLC35B2	2.75e-50
	PTPRC	6.83e-45
	C5AR1	8.03e-42
	PAPSS1	7.96e-35
	TPST2	1.37e-28
	SGMS1	1.11e-17
	CENPL	5.12e-05
	MAD2L1	0.000171
	HAUS6	0.00018
	NOP58	0.000272
	CDK7	0.000384
	DARS	0.000549
	RPL7	0.000567
	ECT2	0.000752
	EEF1A1	0.000994
	SCFD1	0.00323
	BRIX1	0.00405
	B3GALNT2	0.00738
	PLK4	0.00765
	PTP4A2	0.00779
	EIF2S3	0.00959
	SLC35A1	0.0119
	TOPBP1	0.013
	NANS	0.0179
	WDR12	0.0181
	RAN	0.0181
	GTF2A2	0.0394
	CDC27	0.0655
	PRPF39	0.0669
	HHLA2	0.0745
	UNC50	0.079
	C5orf34	0.0826
	ALG3	0.0865
	KIF18A	0.0897
	WDR48	0.0897
	CCT4	0.09
	MAK16	0.0901
	SUPT16H	0.139
	PAICS	0.182
	NDUFB5	0.191
	MRPS6	0.211
	EFTUD1	0.211
	XPO1	0.311
	AK6	0.324
	SNAPC5	0.333
	CUL3	0.334
	POLR2K	0.34
	EIF5	0.349
	SMC6	0.397
	CCT8	0.425
	RBM8A	0.447
	FCF1	0.454
	MTBP	0.517
	MBTPS1	0.538
	LCE2A	0.56
	NUP155	0.652
	CPSF6	0.662
	EIF3E	0.671
	ZNF791	0.671
	NCBP1	0.708
	RFC1	0.777
	GNPNAT1	0.781
	CC2D2B	0.827
	NCAPG	0.837
	KIF23	0.884
	EIF2B5	0.948
	EIF2B3	0.948
	RIF1	0.948
	SNX5	0.955
	RPL39	0.962
	HNRNPK	0.975
	UXT	0.00010012
	VMP1	0.00010672
	NAA35	0.00010672
	ZNF107	0.00010672
	VCPKMT	0.00010967
	DYNC1I2	0.00011827
	EMILIN1	0.00012585
	ANK3	0.00013083
	TEX264	0.00013336
	TMEM108	0.00013498
	NUF2	0.00013735
	LGALS3	0.00013902
	ETF1	0.0001413
	MEF2A	0.00014179
	POLR1B	0.00014588
	PPP6C	0.00014672
	MIPOL1	0.00014787
	POLR3B	0.00015034
	CBLL1	0.00015433
	UBA2	0.00015433
	POLD3	0.00015433
	RINT1	0.00015433
	EGFP	0.0001552
	YIPF6	0.00015685
	LIN9	0.00016038
	RNMT	0.00016179
	RPL9	0.00016703
	SLC20A1	0.00017399
	SAMD9	0.00017399
	DDX3X	0.0001781
	EIF3J	0.0001849
	SDAD1	0.00019517
	UMPS	0.000198
	SDHD	0.00019876
	THOC7	0.00019943
	SLC25A30	0.00020528
	SMARCE1	0.0002116
	DHDDS	0.00021453
	KIAA0100	0.00022213
	OR5H2	0.00022993
	NR1D2	0.00023538
	RPL29	0.00023845
	CNFN	0.00025392
	RPL30	0.00026556
	VNN2	0.00026603
	COPB2	0.00027119
	DSP	0.00028886
	ACTL6A	0.00029055
	FUT5	0.00029097
	ZNF20	0.00030601
	KIF15	0.00030931
	CCDC77	0.00032077
	SDHA	0.00032077
	HOXA1	0.00032657
	PSMD11	0.00033435
	CARD8	0.0003371
	NWD2	0.0003448
	RHOBTB1	0.00034571
	MRPL22	0.00035969
	NOL10	0.00035969
	PSMA3	0.00036297
	KCNE1L	0.00036897
	SMARCA5	0.00037904
	SLC25A12	0.00040256
	METTL9	0.00041017
	ZNF627	0.00041408
	PCK2	0.000421
	MBTPS2	0.00042276
	ENPP4	0.00042635
	PDK1	0.00042784
	OR5AK2	0.00044717
	IKBIP	0.00046252
	TCP1	0.00046588
	ARRDC3	0.00046837
	MADD	0.00046837
	TXNDC8	0.00046885
	SMC4	0.0004899
	TARDBP	0.00049568
	PRSS42	0.00049568
	DHX36	0.00049568
	FOXI3	0.00049943
	SNAPC1	0.00050047
	DIEXF	0.00051037
	CSRP2BP	0.00052225
	GPR26	0.00052856
	GJC2	0.00054272
	CCDC66	0.0005448
	TPI1	0.00054611
	SON	0.00054611
	C1orf141	0.00055425
	GTPBP4	0.00056091
	POLE2	0.0005669
	ADSSL1	0.00058108
	C3orf17	0.00060662
	GCC2	0.00060662
	PPP2CA	0.00060662
	LCN6	0.00060874
	LRRC34	0.00061563
	COPS3	0.00061691
	PHF5A	0.00062922
	C6orf211	0.00062993
	NAE1	0.00063633
	MIS18A	0.00063708
	UQCRB	0.00064673
	NSMCE2	0.00067245
	TRAPPC1	0.00067245
	KNTC1	0.00067245
	GLRX3	0.00067245
	AMIGO2	0.00067245
	WEE1	0.00069146
	CBL	0.00069813
	YY2	0.00072438
	FAM76A	0.00072686
	ZCCHC9	0.0007305
	RIMKLB	0.00074716
	PPAT	0.00074716
	CEP135	0.00074716
	GARS	0.00074716
	ARFIP1	0.00076921
	CDC5L	0.00078283
	NAA15	0.00078982
	SCN7A	0.00079004
	RPRD2	0.00079004
	ZWILCH	0.00081253
	CEACAM5	0.00082222
	CXCR6	0.00082349
	PPWD1	0.00082367
	TARS	0.00082732
	GPR160	0.00082732
	OR13C8	0.00082732
	SPTLC1	0.00082732
	PSMA1	0.00082732
	TRMT10C	0.00082732
	RIOK3	0.00086057
	CDK1	0.00087736
	SKA2	0.00088068
	MIER1	0.0008808
	LOC730159	0.00089485
	SLC25A40	0.00089735
	PCF11	0.00091445
	HAUS1	0.00091445
	PLCB4	0.00091445
	ALG11	0.00091445
	NLRP14	0.00091445
	MCM6	0.00092235
	NAF1	0.00093664
	GTF2H2	0.00094567
	ATP5G1	0.00095403
	DCAF5	0.00098286
	RPP30	0.00098379
	SSX3	0.00099867
	AZIN1	0.00099969
	C1QTNF2	0.001012
	VPS29	0.001015
	FMN2	0.0010461
	MAP10	0.0010708
	MRGPRX1	0.0010784
	FBXO36	0.0010879
	TANGO6	0.0010938
	SAA1	0.0010961
	THAP5	0.0011044
	PPP1R13B	0.0011221
	CSTF3	0.0011221
	PDSS1	0.0011221
	FGL1	0.0011221
	RFX8	0.0011379
	ZNF44	0.0011588
	LRR1	0.0011593
	SLC38A2	0.0011802
	PSMB1	0.0011802
	ACTR2	0.0012253
	USP10	0.0012253
	RFC4	0.0012253
	LACC1	0.0012253
	USP48	0.0012253
	KLHL8	0.0012253
	PGM3	0.0012557
	CHAF1B	0.0012672
	EPC2	0.0012737
	MTNR1B	0.0012869
	GRIN3A	0.0012962
	VPRBP	0.0013308
	RPL27A	0.0013308
	OR51Q1	0.0013451
	MED1	0.0013601
	CAPN6	0.0013629
	TRIM74	0.0013695
	TUBD1	0.0013704
	TBC1D25	0.0013733
	RBM5	0.0013733
	HMGCS1	0.0013733
	TSEN2	0.0013733
	FBXW5	0.001383
	OR4X2	0.0013855
	FGF21	0.0013885
	SMC1A	0.001393
	CHIC1	0.0014033
	IQCH	0.0014143
	C6orf62	0.0014242
	TMEM126B	0.0014293
	COL28A1	0.0014303
	FAM76B	0.0014303
	SCD5	0.0014501
	SAMD9L	0.0014606
	KIF11	0.0014606
	CKAP5	0.0014606
	UGGT1	0.0014606
	GNG11	0.0014631
	DNM1L	0.0014698
	ITPKA	0.0014929
	KLC1	0.0014958
	YBEY	0.0015186
	GPALPP1	0.0015363
	RPS15A	0.0015419
	ATOH7	0.0015453
	SNW1	0.0015493
	SLITRK6	0.0015555
	TMEM257	0.0015561
	EXOSC2	0.0015606
	B3GNTL1	0.0015613
	SF3B1	0.0015677
	C9orf135	0.0015901
	CCNG1	0.0015909
	EFTUD2	0.0016063
	SURF1	0.0016136
	ATP5O	0.0016161
	CRYZL1	0.0016161
	ZNF189	0.0016161
	PSMA6	0.0016161
	GEMIN6	0.0016161
	NDUFV2	0.0016161
	TADA1	0.0016161
	SUGT1	0.0016161
	VPS45	0.0016785
	DNAJB6	0.0017124
	CCT2	0.0017361
	NARS2	0.0017483
	SMC2	0.0017545
	TRIM24	0.0017614
	CACUL1	0.0017614
	FARSB	0.0017614
	RRM1	0.0017636
	KIAA1524	0.0017797
	RBBP8	0.0017797
	IBSP	0.0017797
	CEP55	0.0017797
	TLR3	0.0017797
	NUTF2	0.0017797
	PICALM	0.0018032
	TOMM20L	0.0018107
	TDRD3	0.0018777
	SENP6	0.0019159
	ADSL	0.0019287
	NRAP	0.0019287
	USP45	0.0019287
	IPO11	0.0019496
	ZNF780B	0.0019496
	CSTF1	0.0019496
	EMC2	0.0019496
	PCNA	0.0020355
	ZNF860	0.0020379
	TUFM	0.0020421
	WDR41	0.0020479
	EFNA3	0.002049
	APOC4	0.0020609
	EMC6	0.0020622
	CLTC	0.0020623
	C14orf93	0.002067
	ENO2	0.0020703
	IL2RG	0.0020964
	PALMD	0.0020964
	FAM110B	0.0021363
	EIF2B1	0.0021412
	CCP110	0.0021412
	TGS1	0.0021412
	DPH5	0.0021412
	EIF4G2	0.0021412
	TBL1XR1	0.0021412
	BOD1L1	0.0021412
	RARS2	0.0021412
	OR8K3	0.0021412
	RALGAPB	0.0021412
	TRIM37	0.0021412
	LACTBL1	0.002153
	PTGES3	0.002155
	ENDOG	0.0021811
	L3MBTL1	0.0021969
	C2orf88	0.0022051
	TPR	0.0022086
	NR5A2	0.0022108
	LMX1B	0.0022311
	TRAF1	0.00225
	AKNAD1	0.0022682
	ACTRT2	0.0022957
	E2F6	0.002297
	POLR2H	0.0023013
	PRKCSH	0.0023173
	SPANXN4	0.0023202
	OTUB1	0.0023483
	AKAP8	0.002369
	ASPH	0.0023924
	TBC1D9	0.0024149
	DPCD	0.0024221
	MAF	0.0024245
	LARGE	0.002431
	WFDC10B	0.0024349
	POLR3H	0.0024478
	NXPH3	0.0024487
	GSDMC	0.0024565
	ZNF136	0.0024565
	CEPT1	0.0024565
	HNRNPA2B1	0.0024565
	RPLP0	0.0024565
	LSM5	0.002467
	COPB1	0.0024754
	DNTTIP2	0.0024913
	NR5A1	0.0025023
	KCNK3	0.0025077
	MRPL13	0.0025088
	ME2	0.0025156
	TRDMT1	0.0025509
	CCDC83	0.0025741
	C19orf38	0.0025867
	BCCIP	0.0026022
	CCT6A	0.0026032
	PDCL	0.0026478
	PNPLA3	0.0026539
	FZD10	0.0026601
	RAP2B	0.0026786
	TRIM51	0.0026803
	RPL35A	0.0027326
	HPS1	0.0027365
	ALYREF	0.0027428
	MFRP	0.0027689
	HSPE1	0.0027788
	APOLD1	0.0027881
	MLNR	0.0028288
	UQCC2	0.0028387
	RHBDF1	0.0028743
	EMR1	0.0028858
	SLC4A7	0.0028985
	PLSCR5	0.0029062
	CCDC144A	0.0029235
	TM9SF3	0.0029235
	KPNA3	0.0029235
	SULT1C4	0.0029235
	HOXC13	0.0029538
	CLP1	0.0029641
	TULP1	0.0029865
	ULK1	0.0029895
	VPS9D1	0.0030121
	DAG1	0.0030294
	CCDC169	0.0030501
	USP8	0.0030504
	MAN2A2	0.0030615
	C5orf51	0.0030619
	RIOK1	0.0030787
	NM_1077686	0.0031141
	NM_1037332	0.0031141
	NM_1143945	0.0031141
	NM_144728	0.0031141
	NM_1145063	0.0031141
	NM_1220769	0.0031141
	NM_1170944	0.0031141
	NM_1103169	0.0031141
	NM_1145769	0.0031141
	NM_1220773	0.0031141
	NM_1007249	0.0031141
	NM_1131064	0.0031141
	NM_1033556	0.0031141
	NM_1146114	0.0031141
	NM_1142861	0.0031141
	NM_1220766	0.0031141
	NM_1080519	0.0031141
	NM_000114	0.0031141
	CCDC126	0.0031277
	GANAB	0.0031791
	B3GNT7	0.0031845
	GAB4	0.0031878
	PSME2	0.0031958
	CDK6	0.0031996
	DENR	0.0032011
	TBC1D17	0.0032146
	CST5	0.0032304
	NR0B1	0.0032417
	KIAA0391	0.0032809
	LMNTD1	0.0032857
	PLK1	0.0033005
	PRMT5	0.0033173
	ARFGEF2	0.0033252
	TIPIN	0.0033372
	MANEAL	0.0033539
	STIM2	0.0034026
	PLA2G1B	0.0034192
	TAAR2	0.0034228
	ZNF395	0.0034253
	C1QA	0.0034371
	DACH1	0.0034408
	ACTR6	0.0034804
	CCDC38	0.0034804
	WDR70	0.0034804
	TLR10	0.0034934
	GPR139	0.003502
	UTP15	0.0035184
	CLDN9	0.0036034
	LYSMD1	0.0036488
	SSRP1	0.0036488
	VPS54	0.0036488
	RCN2	0.0036564
	PPCS	0.0037115
	PYY	0.0037325
	FUT9	0.0037352
	MAGEB5	0.0037466
	GSPT1	0.0037564
	ASUN	0.0037959
	MED17	0.0037959
	FAM227B	0.0037959
	PDIA6	0.0037998
	KRTAP10-2	0.0038432
	NFU1	0.0038583
	APOBEC3A	0.0038825
	SPZ1	0.0038977
	RASL11B	0.0038996
	ZNF518A	0.0039096
	PIPOX	0.0039302
	HDX	0.0039369
	CENPK	0.0039511
	NAPB	0.0039623
	CENPN	0.0039912
	METTL16	0.0040021
	PPP1R7	0.0040172
	MUC16	0.0040602
	ERICH5	0.0041083
	GUCA1C	0.0041083
	BBS12	0.0041083
	RPL32	0.0041152
	SCAP	0.0041359
	CRNKL1	0.0041537
	IDI1	0.0042181
	MIB2	0.0042396
	MAP4K3	0.0042558
	MKLN1	0.0042563
	ZNF780A	0.0042606
	GBAS	0.00427
	MSI2	0.0042779
	ARL10	0.0043088
	SPTSSA	0.0043229
	SBSPON	0.0043783
	ORC3	0.0043826
	CPSF3	0.0044352
	ZNF879	0.0044418
	SLC39A10	0.0044418
	NIPAL1	0.0044418
	C9orf171	0.0044987
	PIK3AP1	0.0045089
	TREH	0.0045265
	ACBD5	0.0045493
	IARS	0.0045688
	ZNF207	0.0045984
	GALNT3	0.0046108
	BNIP1	0.0046357
	GNPTAB	0.0046453
	CYP2U1	0.0046553
	LRRC1	0.0046855
	GPR17	0.0046868
	ZNF777	0.0047099
	DDX46	0.0047348
	MYOT	0.0047494
	SMIM21	0.0047592
	SLC30A8	0.0047872
	DDX11	0.0048034
	VIM	0.0048079
	EXOSC7	0.0048079
	CSN3	0.0048079
	ADAM23	0.0048079
	ZMYM5	0.0048079
	HMGXB3	0.0048376
	NUPL1	0.0048547
	MAGOH	0.0048611
	RHOB	0.004875
	ZC3HC1	0.0048961
	PMPCA	0.0049563
	CLECL1	0.004971
	HLA-B	0.0049824
	ACSM1	0.0050021
	PTPLAD2	0.0050171
	C9orf50	0.0050308
	PDZD11	0.0050371
	RASAL2	0.0050944
	CDC45	0.0051303
	MCCD1	0.0051557
	SUPT4H1	0.0051577
	MEF2C	0.0051674
	SOS1	0.005193
	THOC1	0.005193
	MMRN1	0.005193
	SLC52A2	0.005193
	CST1	0.005193
	DLGAP5	0.0052142
	TYMSOS	0.0052142
	ZNF540	0.005229
	DHRS11	0.005242
	AQR	0.005242
	CD86	0.0052559
	GDF3	0.0053
	CLHC1	0.0053192
	DGKG	0.0053441
	MYBL2	0.0053685
	CHERP	0.0053901
	DDX21	0.0053907
	KIF3A	0.0053907
	RIC8B	0.0054891
	NHSL1	0.0054983
	SPIB	0.0055285
	CCDC91	0.0055989
	NSUN3	0.005603
	TRAPPC8	0.005603
	SAR1A	0.005603
	ZMYM6	0.005603
	MAGT1	0.0056368
	TMEM194B	0.0056368
	PARD3	0.0056722
	MEGF11	0.0056808
	ZNF211	0.0056909
	RAP1GDS1	0.0056933
	CXXC1	0.0057182
	FAM60A	0.0057905
	CTNNBL1	0.0057937
	KRAS	0.0058098
	LYPD6B	0.0058272
	VPS13C	0.0058277
	SNX3	0.0058547
	RAD54B	0.0058745
	PI4KA	0.0059014
	CENPBD1	0.0059742
	GNG7	0.0060288
	PRPF38A	0.0060429
	SUDS3	0.0060429
	TMOD2	0.0060429
	BRIP1	0.0060522
	GNAQ	0.0060522
	ANAPC1	0.0060522
	TAF1B	0.0060522
	RPL5	0.0060522
	CFL1	0.0060522
	LSM8	0.0060603
	LILRA3	0.0060626
	CEP85	0.0060742
	WNT5B	0.0061304
	VKORC1L1	0.0061348
	ATP5A1	0.0061417
	RGR	0.0061671
	PIWIL4	0.0061889
	GPR116	0.00622
	ZDHHC13	0.006227
	ISL2	0.0062677
	RAB3GAP2	0.0062873
	PKP2	0.0062873
	SLC30A7	0.0062881
	TFRC	0.0062966
	PLEKHA3	0.0063135
	GNE	0.0063289
	DAB2	0.0063295
	ISCU	0.0063382
	POT1	0.0063403
	POP5	0.0063871
	RPS5	0.0063871
	ZNF585B	0.0064144
	EGR3	0.0064388
	GRIK5	0.0064509
	VWA9	0.006468
	RPIA	0.0064856
	PREP	0.0064966
	C1orf122	0.0065154
	OAT	0.006516
	GABPB1	0.0065268
	AHCTF1	0.0065268
	ADD1	0.0065424
	RPS27A	0.0065442
	DYRK1A	0.0065974
	RAPGEF3	0.0066146
	TTC29	0.0066293
	C1orf131	0.0066293
	SAV1	0.0066293
	HMBOX1	0.0066293
	PER3	0.0066324
	IP6K1	0.0066426
	ABCE1	0.0066723
	ZNF761	0.0067255
	VSIG10L	0.006741
	OR11G2	0.0067543
	OR1J4	0.006757
	LDB2	0.006757
	KCP	0.0067572
	FAM71D	0.0067713
	USP7	0.0067806
	OR8U1	0.0067912
	KIR3DL1	0.0067982
	C20orf173	0.0068628
	GPR161	0.0068638
	RASSF9	0.0069114
	SENP7	0.0069122
	PTPRZ1	0.0069626
	ARL6	0.0069814
	ALCAM	0.007
	SKA3	0.0070191
	MFN2	0.0070191
	CENPE	0.0070191
	MC5R	0.0070417
	RPL10	0.0070451
	KARS	0.0070619
	ARIH2	0.0070715
	TAF1L	0.0071373
	DHRS7C	0.0072112
	OR5T3	0.0072124
	DPY19L4	0.0072745
	ZNF121	0.0072804
	MCM3	0.0072895
	RABL3	0.0072995
	CNTROB	0.0073203
	DNAJC3	0.0073268
	GPC6	0.0073619
	C3orf80	0.0073749
	LMNB1	0.0073816
	DDX17	0.0074154
	KLHL26	0.0074575
	LOC100289561	0.0074871
	FRG1	0.0075675
	CCDC171	0.0075675
	CCDC175	0.0075675
	QRSL1	0.0075675
	ARIH1	0.0075675
	ZC3H12D	0.0075675
	UBR2	0.0075675
	PSMC6	0.0075675
	MIS18BP1	0.0075675
	CRBN	0.0075675
	FAM208B	0.0075675
	E2F5	0.007587
	C1orf101	0.0075977
	NRF1	0.0076327
	AGBL4	0.0076327
	FBXL4	0.0076327
	SPANXN2	0.0076641
	PTBP3	0.0076643
	HIST1H3B	0.0076707
	NHP2L1	0.0076723
	DUOXA2	0.0076861
	SWAP70	0.0077319
	XKR4	0.0077776
	UGP2	0.0077809
	SLC35F1	0.0078233
	ME3	0.0078668
	SNAPC2	0.0078668
	TMEM55A	0.007869
	HSP90AB1	0.0079827
	AKR1B15	0.0079926
	DDX27	0.0080135
	NUP88	0.0080135
	RFC3	0.0080135
	VWA5B1	0.0080135
	KIF5A	0.008018
	KRT79	0.0080976
	TRPM7	0.0081066
	UBAP1L	0.0081433
	RRP36	0.00816
	XRCC4	0.00816
	WDR35	0.00816
	FCHSD2	0.00816
	LAMP1	0.00816
	RPRD1B	0.00816
	CHAF1A	0.00816
	PPIP5K2	0.00816
	TBC1D32	0.00816
	OSGEPL1	0.00816
	PEX1	0.0081814
	NEDD1	0.0082757
	NR1D1	0.0082873
	PHF21A	0.0083261
	PRKRIR	0.0083357
	PHF6	0.0083769
	NPRL2	0.0083922
	C10orf67	0.0083922
	TRIM6	0.0083932
	FAM177B	0.0084207
	ADSS	0.008446
	IL1F10	0.0084514
	FAM111B	0.0084613
	PTGDR2	0.0084982
	HEATR5A	0.0085672
	PKN2	0.0085889
	PLIN1	0.008646
	2007-03-01	0.0086571
	OR2M5	0.0087825
	NME8	0.008783
	TAS2R13	0.0088085
	MAP9	0.0088085
	RNF111	0.0088133
	SERPINB6	0.0088133
	KCNJ6	0.0088133
	PNPT1	0.0088133
	FILIP1	0.0088133
	UBE2V2	0.0088429
	SNAI1	0.0088744
	GTF2E2	0.0088941
	CASP6	0.0088941
	NDUFAF7	0.0089075
	ZNF180	0.0089199
	POC1A	0.008954
	CXADR	0.0089605
	PDIK1L	0.0090065
	SCRN3	0.0090156
	ARFGAP3	0.0090278
	RRAS	0.009057
	EDN3	0.0090704
	ZSWIM3	0.0091027
	AWAT2	0.0091484
	ASB4	0.0091527
	OR4P4	0.0091527
	CFAP36	0.0091744
	OLAH	0.0091744
	CXorf57	0.0091782
	PTX3	0.009194
	ZBTB25	0.0092368
	GPSM2	0.0092368
	LANCL3	0.0092853
	PAPOLB	0.009296
	DCUN1D5	0.0093703
	CBX3	0.0093703
	LHFP	0.0093767
	ZNF445	0.009468
	PXT1	0.0094927
	LIN28B	0.0094946
	AGMO	0.0094946
	DDX6	0.0094946
	CGNL1	0.0094946
	WASF3	0.0094946
	ZNF665	0.0094946
	MMS22L	0.0094946
	PRKAB2	0.0095162
	FAM127A	0.0095212
	EIF3F	0.0095392
	ACOT9	0.0095822
	PCDHA1	0.0095822
	C1orf229	0.0096461
	MTERF3	0.0096505
	ANKRD18B	0.0096632
	RAD50	0.0096632
	ATIC	0.0096632
	DCP1A	0.0096827
	ZNF501	0.0096888
	MMP13	0.0097393
	NIFK	0.0098174
	SLC48A1	0.0098579
	NACA2	0.0098867
	PCDHB13	0.0098888
	CYP2R1	0.0099351
	RBM39	0.010025
	PSMB2	0.010037
	FGFR4	0.010061
	MTUS1	0.010062
	DCTN1	0.010068
	CDKN2D	0.010077
	PTPN9	0.010098
	BFSP1	0.010113
	GALNT8	0.010198
	KCMF1	0.010215
	OR10A7	0.010215
	LEPR	0.010215
	SLU7	0.010215
	FASTKD5	0.010215
	TSGA10	0.010215
	INTS8	0.010215
	CWC22	0.010215
	SFTA2	0.01024
	PAFAH1B2	0.010256
	UBA5	0.010274
	CSE1L	0.010274
	SF3B2	0.010289
	OLFML3	0.010331
	KIAA0586	0.010367
	MYCL	0.010399
	BCL2L2-PABPN1	0.010535
	TREM1	0.010546
	CFL2	0.010547
	MAGI1	0.010563
	SLC2A9	0.010597
	IFI35	0.010609
	THSD1	0.010615
	RECQL	0.010615
	RBM27	0.010615
	CCNE1	0.010615
	SMC3	0.010615
	RTP3	0.010615
	VSTM5	0.010654
	ZNF701	0.010675
	TKTL1	0.010766
	CDH13	0.010877
	RNASE8	0.010899
	MCF2L2	0.010973
	KRIT1	0.011022
	BRCA2	0.011022
	DEFB112	0.011022
	SERPINA2	0.011022
	GTF2A1	0.011022
	BMPR2	0.011022
	USP40	0.011022
	RPL4	0.011022
	EMC8	0.011022
	YEATS2	0.011022
	ZNF77	0.011022
	UTP6	0.011022
	BUB1B	0.011034
	ARL5B	0.011134
	RPS13	0.011137
	NMRK1	0.011137
	DRD2	0.011166
	VEPH1	0.01121
	FBXO48	0.011211
	EXOSC4	0.011231
	FAM188A	0.011231
	MSTN	0.011231
	MNAT1	0.011231
	DOCK3	0.011231
	NOL11	0.011231
	LMCD1	0.011231
	POFUT1	0.011268
	KHDC1	0.011268
	NPTX1	0.011276
	ROMO1	0.011321
	RBX1	0.011326
	VTA1	0.011328
	ADAMDEC1	0.011443
	AQP6	0.011475
	TMC6	0.011516
	ZNF600	0.011528
	RPL24	0.011554
	PRKCI	0.011589
	ACKR2	0.011611
	POLR3D	0.011617
	TTC19	0.011685
	SBDS	0.011859
	PSTK	0.011859
	SNX29	0.011859
	BIRC6	0.011859
	PLOD2	0.011859
	PPP2R3C	0.011859
	DDX50	0.011859
	SEL1L	0.011859
	TRIM38	0.011859
	SNAI2	0.011859
	PDS5B	0.011859
	CIRH1A	0.011859
	EBF3	0.011885
	S100PBP	0.011949
	CHD9	0.011949
	GBP2	0.011976
	PSMD12	0.011995
	C6orf203	0.012
	RPF2	0.01206
	TPTE	0.012143
	ZEB1	0.012162
	MAP1LC3C	0.012285
	ATP1A1	0.012319
	UBA6	0.012383
	FAH	0.012431
	RYBP	0.012442
	RCL1	0.012451
	SLC9A1	0.012477
	ALDH1A2	0.012498
	PRKCE	0.012522
	ERMARD	0.012527
	RBBP4	0.012554
	ATP6AP1	0.012568
	FGFR1OP2	0.012643
	TRIM45	0.012643
	MRPL40	0.012643
	MTHFD1	0.012643
	IL13RA2	0.012643
	COX10	0.012643
	CEP170	0.012643
	KRT40	0.012643
	WDR49	0.012643
	CD180	0.012643
	STK39	0.012643
	NEFM	0.012678
	ZNF322	0.012688
	FRMD7	0.012688
	NXPE2	0.012688
	PABPC4	0.012688
	CTDSPL2	0.012688
	MALT1	0.012688
	SNAP23	0.012791
	ADAM21	0.012791
	WRAP73	0.012795
	ARF4	0.012882
	XAB2	0.012895
	CNOT10	0.012899
	RICTOR	0.0129
	NPFFR2	0.012907
	CSF3R	0.012932
	DNAJC21	0.013035
	FAM186A	0.013068
	RPS20	0.013103
	TDG	0.013159
	RPS6KB1	0.013187
	PDCD5	0.013199
	ST3GAL2	0.013205
	WDHD1	0.013293
	SUSD5	0.013296
	2014-09-01	0.013299
	NUS1	0.013333
	STAT5A	0.013341
	ZNF549	0.013362
	DOCK10	0.013382
	PGM5	0.013426
	PARP9	0.013426
	HOXD12	0.013432
	ABCB7	0.013445
	GDPD5	0.013459
	TCN1	0.013459
	OR10J5	0.013459
	GRPEL2	0.013482
	SYT12	0.013523
	TBATA	0.013577
	TBL1X	0.013688
	MYBPH	0.01371
	IGSF21	0.013751
	ZNF391	0.013775
	CDK15	0.013794
	CST6	0.013827
	NR1H2	0.013837
	ZNF462	0.013841
	USP42	0.013871
	LGSN	0.013903
	PYURF	0.013932
	CD55	0.013978
	DDX52	0.014063
	CNTD1	0.014069
	ZFY	0.014095
	CEP63	0.014114
	RPTOR	0.014145
	KIN	0.01421
	HIATL1	0.01421
	WDSUB1	0.01421
	RFC5	0.01421
	RPS6	0.01421
	PARP3	0.014251
	ACOT2	0.01428
	TBC1D1	0.014308
	HRH1	0.014311
	SKIV2L2	0.014353
	ENG	0.014354
	ZNF280C	0.014366
	EXOC5	0.014366
	C14orf28	0.014366
	UBTF	0.014366
	RBM44	0.014366
	ZCCHC11	0.014366
	HELZ	0.014366
	ZNF248	0.014366
	NFE2L2	0.014366
	NDC80	0.014366
	TIMELESS	0.014419
	MDM4	0.014429
	NEK2	0.014465
	ACAN	0.014478
	SCGB2A2	0.014482
	C14orf159	0.01452
	SUV420H2	0.014523
	SPATA2	0.014569
	ABHD12B	0.014671
	ENDOV	0.014727
	TM4SF18	0.014757
	OR6C76	0.014757
	VPS41	0.014902
	ASXL1	0.014904
	KCNE4	0.014907
	DIS3L	0.014946
	FAM163B	0.015013
	FOXH1	0.015023
	TAS2R31	0.01504
	SOCS4	0.015068
	PRDM16	0.015078
	CST7	0.015092
	AKAP13	0.015108
	C1orf86	0.015128
	FGD1	0.015159
	ADAM28	0.015205
	TRAF3IP1	0.01525
	CLDN17	0.015254
	MRPL30	0.015286
	TMA16	0.015286
	CRY1	0.015295
	BCL2L10	0.015301
	FAM35A	0.015355
	VWC2L	0.015355
	FAM160B1	0.015459
	PTPN11	0.015462
	DNAJB11	0.015462
	NEMF	0.015462
	PDK4	0.015462
	TANC1	0.015462
	NDUFS3	0.015462
	ESPL1	0.015462
	NKTR	0.015462
	SENP1	0.015462
	XRN1	0.015462
	NOL9	0.015462
	SYNPR	0.015462
	RPL6	0.015462
	CDS2	0.015462
	TUBGCP4	0.015554
	ACAT1	0.015564
	TIGD2	0.015564
	WBP5	0.015588
	INTS9	0.015602
	NELL2	0.015602
	C2orf80	0.015604
	GRM1	0.015659
	SNRNP200	0.015664
	KANK1	0.015668
	MYH1	0.015704
	CACNA1C	0.015749
	LIPI	0.015847
	MYLK4	0.015847
	PCM1	0.015847
	NFKB2	0.015847
	DIAPH2	0.015847
	ZNF480	0.015847
	ZNF560	0.015847
	SUCLA2	0.015847
	HPS4	0.015847
	TMPRSS11A	0.015923
	TBC1D15	0.015923
	SCAF8	0.015938
	BUB3	0.016029
	ZNF813	0.016072
	RPL26L1	0.016072
	DTWD1	0.016111
	PAM	0.016112
	DYNC1H1	0.016132
	ENO1	0.016199
	PGRMC2	0.016235
	GGA1	0.016393
	RELL2	0.016475
	SMAD4	0.016527
	GPR123	0.016551
	RALGAPA1	0.016583
	SLC47A1	0.016583
	CCDC88C	0.016583
	CTLA4	0.016658
	NARS	0.0167
	ANKRD18A	0.016702
	GJA1	0.016721
	SLC43A1	0.016721
	CPNE3	0.016721
	SLC25A16	0.016721
	ORC1	0.016721
	PRMT1	0.016772
	OSBPL11	0.016793
	DHX40	0.016897
	FBXL5	0.016897
	TMEM25	0.016903
	AKR1E2	0.016928
	DRGX	0.016929
	FOXI2	0.016974
	LAMP5	0.017045
	OR2A14	0.017088
	UBAC1	0.017145
	CHRNA9	0.017201
	PEBP1	0.017246
	KIZ	0.017271
	UHMK1	0.017298
	TMEM235	0.017324
	LRP5L	0.017337
	KLHL7	0.017346
	TP53	0.017382
	ITGB1	0.017391
	WDR90	0.017427
	TMEM196	0.017473
	CMTM7	0.017493
	NRARP	0.017502
	OGDH	0.017523
	ZNF638	0.017576
	HCRTR1	0.017576
	CDH18	0.017576
	PRMT9	0.017576
	LGI1	0.017576
	OR2M4	0.017608
	FOXL1	0.017709
	NAMPT	0.017716
	SERPINB5	0.017716
	LRRCC1	0.017716
	MRPS5	0.017716
	SRRD	0.017716
	ATP6V1C1	0.017716
	SLC38A11	0.017716
	TRMT11	0.017716
	CEP192	0.017716
	TDP2	0.017716
	ESD	0.017716
	CASC4	0.017716
	SERPINB11	0.017816
	SSTR4	0.017835
	CSK	0.01788
	RAB6A	0.017886
	CCDC47	0.017926
	FBXW11	0.018065
	KRR1	0.018085
	C5	0.018197
	TMEM247	0.018211
	CBWD5	0.018242
	CTSH	0.018243
	APH1B	0.018288
	KRT77	0.018295
	CHN2	0.018316
	PLAT	0.018403
	FKBP1A	0.018433
	ANKRD17	0.018443
	B3GNT3	0.018506
	ZNF433	0.018506
	SERTAD2	0.018506
	CDCP1	0.018506
	NR2C1	0.018506
	TEX11	0.018506
	KIR3DL2	0.018589
	PCDHA6	0.01865
	NSUN5	0.01878
	UBE2N	0.018796
	C12orf29	0.018807
	GLUD1	0.018807
	KIAA1467	0.018831
	RERE	0.018859
	ZNF721	0.018876
	OR5H1	0.018932
	C4orf17	0.018962
	GAS2L3	0.018962
	AURKA	0.018962
	COPG1	0.018962
	KIAA1429	0.018962
	ANKRD32	0.018962
	TAAR8	0.018962
	PABPC1	0.018962
	SASS6	0.018962
	NUP153	0.018962
	WTAP	0.018962
	SAP30BP	0.018962
	CPXCR1	0.018962
	JADE3	0.018962
	MYLK3	0.018967
	SERTM1	0.018995
	RCBTB2	0.019043
	ZAK	0.019057
	ITGA8	0.019103
	ZNF468	0.019105
	PSPH	0.019192
	RC3H1	0.019238
	TTC16	0.019284
	HES1	0.0193
	ADCY9	0.01936
	TMTC4	0.019428
	PHLDB1	0.019449
	HECTD1	0.019449
	PSMD4	0.019449
	ASAP1	0.019503
	ACRBP	0.01951
	PRPF18	0.019543
	PCGF2	0.019546
	FOXO3	0.019555
	TVP23A	0.0196
	RPL17	0.019637
	TREML4	0.019881
	KCNE3	0.019881
	RGS1	0.019881
	PDE11A	0.019899
	SMARCC1	0.019943
	LRRTM2	0.020007
	IFI27L1	0.020008
	PTPN12	0.020079
	NCL	0.020079
	PSMD7	0.020079
	GET4	0.020188
	C10orf54	0.02021
	VCP	0.020292
	ING2	0.020323
	N4BP2L2	0.020348
	SLC7A6	0.020369
	SEC24D	0.020373
	UGT2A1	0.020373
	TCEB3	0.020373
	LRRC57	0.020373
	SGOL2	0.020373
	UCK1	0.02048
	TTC9B	0.020511
	STRIP1	0.020555
	NEK9	0.020685
	LOC100130539	0.020714
	SPDYA	0.020816
	MRPL45	0.020816
	NAGLU	0.02082
	ZDBF2	0.020821
	C1orf27	0.020821
	NRXN1	0.020834
	LGI2	0.020866
	SYT10	0.020911
	IQCJ	0.020929
	AFG3L2	0.020935
	CCNL2	0.021001
	C1QL4	0.021033
	CDK11A	0.02109
	TRIT1	0.021182
	YPEL4	0.021201
	KRT222	0.021272
	PLTP	0.021314
	RPS14	0.021317
	MRPL15	0.021338
	ZNF844	0.021472
	CDKL4	0.021472
	METTL14	0.021472
	HORMAD2	0.021498
	LBH	0.021556
	TGFBR1	0.021566
	ADRA1D	0.021588
	C12orf74	0.021641
	NLRP12	0.021723
	SLC7A7	0.021949
	OR4N2	0.021959
	ZNF585A	0.021992
	LITAF	0.021994
	FKBP14	0.022049
	PDS5A	0.022049
	UGT2B28	0.02209
	FLRT1	0.02213
	C5AR2	0.022175
	C9orf69	0.022183
	KATNA1	0.022199
	ZNF268	0.022199
	KRT34	0.022219
	NAA10	0.022219
	PRC1	0.022219
	JKAMP	0.022242
	EPRS	0.022242
	KCNJ5	0.022256
	ACVR1B	0.02231
	KLK14	0.0224
	RAD9B	0.02251
	TBCE	0.02251
	GRID1	0.022535
	ADAMTS19	0.022626
	BIRC5	0.022646
	CHST9	0.022702
	OR52H1	0.022702
	ZNF432	0.022702
	GPATCH8	0.022702
	ZNF846	0.022702
	METAP2	0.022702
	HSD17B6	0.022702
	SNX16	0.022702
	NME4	0.022806
	S100G	0.022826
	PELI2	0.023027
	OBP2A	0.023098
	CRLS1	0.023131
	WDR44	0.023131
	FBXW7	0.023275
	TMEM150A	0.023347
	KRT39	0.023363
	FBXL3	0.023363
	GALNT13	0.023363
	ACTR8	0.023437
	PDZRN3	0.023482
	JMJD7	0.023527
	ARL5A	0.023712
	PIN4	0.023759
	IFRD1	0.023759
	NDC1	0.023781
	NPL	0.023781
	IDH3B	0.023797
	DERL3	0.0238
	MYO19	0.023843
	CYB561D1	0.023854
	ENPP2	0.023888
	LUC7L3	0.023895
	G2E3	0.023927
	EED	0.023927
	CP	0.023927
	SETD3	0.023927
	FGD2	0.023927
	MISP	0.023933
	RALA	0.023999
	ERCC6	0.024023
	SGCD	0.024042
	MMP25	0.024113
	CDC26	0.024157
	GRK5	0.024158
	SLC29A2	0.024203
	EXOC3	0.024248
	RRAGA	0.024293
	FIGLA	0.02437
	NFYB	0.02437
	PELP1	0.024386
	PARP15	0.024386
	SCAPER	0.024386
	IQGAP2	0.024386
	ARHGAP32	0.024428
	ROCK2	0.024514
	IGFL2	0.024572
	RPS6KL1	0.024608
	TUBB4B	0.024609
	KPNB1	0.024617
	RAB9B	0.024631
	SLC12A7	0.024698
	C12orf66	0.024793
	SMLR1	0.024799
	CLASRP	0.024804
	ADRB2	0.024833
	UFD1L	0.024918
	SLC2A2	0.024918
	RPS6KB2	0.024923
	ZNF546	0.025058
	CAPS	0.025097
	ATP6V0E2	0.025115
	PDCL2	0.025188
	OR5H6	0.025188
	INTS4	0.025199
	OR6C70	0.025228
	ASAP2	0.025253
	PERP	0.025253
	NHLRC2	0.025253
	TLR1	0.025253
	TPPP2	0.025253
	EHBP1	0.025253
	TRMT10A	0.025253
	ZNF567	0.025253
	HRNR	0.025253
	EIF4B	0.025253
	MPLKIP	0.025373
	TMPRSS6	0.02556
	SDC3	0.025598
	DERA	0.025643
	COPS4	0.02573
	RDH13	0.025818
	SLC7A1	0.025823
	SNRPA1	0.025868
	DTX3L	0.025945
	MYL1	0.026062
	ATXN7L2	0.026137
	POGLUT1	0.026145
	NOL8	0.026178
	SUSD3	0.026231
	SLC22A18AS	0.026294
	APOA2	0.026334
	COIL	0.026407
	LCN8	0.026411
	ARHGAP5	0.026444
	ZZEF1	0.026452
	RANGAP1	0.026454
	BGLAP	0.026525
	KITLG	0.026559
	GRK6	0.026721
	HINT3	0.026754
	PNP	0.026789
	SEH1L	0.026789
	ATG2B	0.026789
	PSMB7	0.026789
	DDX60L	0.026789
	MTMR6	0.026789
	SLC22A24	0.026789
	MOCS3	0.026789
	CFAP97	0.026789
	RIOK2	0.026854
	ZBBX	0.026898
	C9orf41	0.026991
	STPG2	0.02726
	ILF2	0.027282
	ANAPC5	0.027282
	NDUFB9	0.027282
	NT5C	0.027294
	TMEM45A	0.027294
	SLC6A1	0.027309
	VAV3	0.027341
	LEKR1	0.027387
	TRHR	0.027395
	LDLRAD4	0.027595
	DCHS2	0.027677
	C8orf4	0.027685
	TMCO2	0.027701
	MYL10	0.027747
	ELMOD2	0.027747
	KDM5D	0.027753
	LRP3	0.027754
	MRGPRX4	0.027799
	KRTAP25-1	0.0278
	EDAR	0.027844
	FAT4	0.027889
	RNF133	0.027934
	FAM124B	0.027978
	STAG2	0.027978
	C17orf105	0.02801
	EFNA2	0.028068
	ARL1	0.02822
	OGFRL1	0.028282
	TPX2	0.028282
	LRRC66	0.028282
	ASXL3	0.028282
	ASCC3	0.028282
	NCAPD3	0.028282
	GIPC2	0.028282
	RABEP1	0.028337
	UPF3A	0.028382
	PITPNM2	0.028402
	TWF2	0.028427
	WNK3	0.028606
	SUCO	0.028665
	TMEM5	0.02874
	LMOD3	0.028786
	C9orf163	0.028792
	KCNC2	0.028831
	VWC2	0.02892
	LHX3	0.028965
	2004-03-01	0.029055
	GOLIM4	0.029099
	PTER	0.029124
	ATP13A2	0.029144
	POFUT2	0.029189
	IKBKE	0.029225
	ACSM5	0.029279
	LRRC49	0.029319
	SLAMF8	0.029379
	SRP72	0.029435
	MX2	0.029503
	PLIN3	0.029602
	OR2J3	0.029629
	ADH4	0.029682
	DRP2	0.029726
	ZSWIM1	0.029727
	HDAC11	0.029748
	C1orf112	0.029767
	ACRC	0.029767
	HAUS2	0.029767
	PPL	0.029767
	ARHGAP15	0.029767
	XK	0.029767
	KLHL22	0.029767
	UGT2B4	0.029767
	FBXO16	0.029772
	ZNF620	0.029793
	DCTPP1	0.029798
	SNX18	0.029906
	MAPRE2	0.029907
	DEFB125	0.029927
	LILRB1	0.029962
	OCLN	0.030076
	KCTD10	0.03013
	SKA1	0.030151
	TSPAN8	0.030151
	RNF138	0.030173
	DISC1	0.030173
	HYAL4	0.030175
	POLE	0.030203
	ADAMTS8	0.030219
	TLR4	0.030418
	SKI	0.030488
	SLC10A3	0.030533
	SETD5	0.030554
	SMIM19	0.030568
	SLC6A12	0.030622
	LUZP6	0.030657
	ADAMTS14	0.030667
	IGF2	0.030714
	DTHD1	0.030738
	APOBEC3F	0.030761
	TFR2	0.030813
	LGALS8	0.030882
	USP14	0.030882
	SLC17A9	0.030935
	OR5D16	0.030951
	GOSR2	0.031001
	UTP11L	0.031012
	RWDD2B	0.031012
	TRIM59	0.031012
	CEP104	0.03107
	PAX5	0.031125
	ZNF579	0.031159
	GBGT1	0.031226
	ID1	0.031306
	TEX40	0.03135
	KCTD19	0.03135
	FAT3	0.03135
	PRUNE2	0.03135
	TFB1M	0.03135
	ERCC3	0.03135
	NELFA	0.03135
	OR10J1	0.03135
	DCTN5	0.031549
	GPR56	0.031549
	FGD3	0.031562
	NUDCD1	0.031574
	DEFB118	0.031602
	POTEI	0.031602
	PTPN3	0.031611
	LIMA1	0.031702
	TCEB1	0.031722
	CRISPLD2	0.031741
	MRPS28	0.031762
	FAM135A	0.031803
	KCNQ4	0.031875
	SHB	0.031964
	PLEK	0.032009
	FTSJ3	0.032031
	BTBD9	0.032081
	RANGRF	0.032098
	NXPH1	0.032143
	ZNF705E	0.03216
	SAPCD2	0.032169
	FBLN1	0.032187
	MAP3K12	0.032261
	FUT4	0.032322
	ALKBH7	0.032417
	NNT	0.032456
	SPRR4	0.032458
	REV3L	0.032532
	ZNF226	0.032545
	B3GALT2	0.032567
	BAG1	0.032583
	LPAR6	0.032583
	OR6K6	0.03259
	PIGF	0.032643
	CIART	0.032679
	TRPM3	0.032694
	AXIN2	0.032724
	PLXDC2	0.032735
	SMAD3	0.032819
	SIGLEC15	0.032858
	HOXC12	0.032902
	FSD1L	0.032907
	AK5	0.032937
	GBF1	0.032943
	HBS1L	0.032957
	TMEM167A	0.033112
	HSPBP1	0.03317
	BRD8	0.033182
	AKAP9	0.033182
	KLHL10	0.033182
	RAB11FIP2	0.033182
	MTMR9	0.033182
	REC114	0.033182
	WASF1	0.033182
	GFM1	0.033182
	TRPM4	0.033182
	ASB12	0.033182
	PCDH18	0.033182
	SMG1	0.033182
	GPCPD1	0.033182
	FEN1	0.033182
	CDKAL1	0.033182
	ANKRD44	0.033182
	MAL2	0.033182
	RANBP9	0.033215
	NHEJ1	0.033256
	PIGM	0.03326
	AP1S3	0.033317
	CHMP5	0.033321
	MAD2L2	0.033359
	NDE1	0.033393
	CHMP3	0.033411
	NCK1	0.033419
	NXPE1	0.033438
	C16orf47	0.033503
	AIFM1	0.033577
	MPV17L2	0.033617
	C22orf24	0.033737
	RDH14	0.033791
	PRF1	0.033795
	KCTD6	0.033865
	MARVELD2	0.033929
	LGALS13	0.033995
	KIF17	0.034022
	GIMAP2	0.034063
	TIAL1	0.034103
	DFNA5	0.03411
	BACE1	0.03411
	FAM173A	0.034179
	GYG1	0.034222
	LRRC23	0.034231
	ZNF257	0.034257
	OR13D1	0.034324
	RPS12	0.034327
	CCDC25	0.034327
	PIEZO2	0.034503
	ARHGAP22	0.034548
	PPP1R3D	0.034553
	OR2C3	0.034643
	SOX3	0.034687
	A1CF	0.034735
	GLRA2	0.034748
	NAA20	0.034823
	CDC23	0.034834
	CALML5	0.034898
	PCSK4	0.03491
	SLC2A10	0.034949
	ZBED2	0.034954
	IGF2R	0.035096
	ZMAT2	0.035096
	VPS13A	0.035096
	ATM	0.035096
	ATP7A	0.035096
	NEK5	0.035096
	ZP2	0.035096
	TOR1A	0.035096
	GTF2H1	0.035096
	COG1	0.035096
	TUBB8	0.035096
	SAMHD1	0.035096
	SLC35G2	0.035096
	SUV39H2	0.035096
	HSPA5	0.035096
	VGLL2	0.035106
	GINS2	0.035128
	TAC1	0.035136
	FOXP1	0.035198
	TTC1	0.035263
	AIM1	0.035445
	PARG	0.035453
	CHMP4A	0.035493
	CDC20B	0.035534
	RPS3	0.035541
	GPR107	0.035634
	RGP1	0.035979
	CCDC65	0.036022
	GPR171	0.036077
	HEMK1	0.036113
	SYCE1L	0.036157
	MROH9	0.036181
	RXFP3	0.036202
	EYA2	0.036246
	OR4A47	0.036306
	RARG	0.03635
	KDM1A	0.036361
	TRAK2	0.036396
	NT5DC2	0.036418
	KLRC1	0.036474
	ATRX	0.036479
	PPIL6	0.036479
	TXNL4A	0.036563
	NUP98	0.036565
	BTD	0.03662
	ACVR2A	0.03671
	PGPEP1L	0.036922
	CEBPG	0.036942
	TMEM87A	0.037112
	OR5P3	0.03713
	GTF2B	0.03713
	KIF6	0.037162
	ADRBK2	0.037219
	IL1RAPL2	0.037219
	DEPDC4	0.037219
	PGGT1B	0.037219
	AGTR2	0.037219
	PCDHA4	0.037225
	LOC100505478	0.037353
	CPLX1	0.037372
	ZNF25	0.037383
	RAB7A	0.037403
	TMEFF2	0.037403
	ZBP1	0.037408
	2010-03-01	0.037445
	BACH1	0.037448
	ST18	0.037568
	DYRK4	0.037684
	SLC36A3	0.037714
	HUNK	0.037848
	PFDN1	0.037873
	PVR	0.037937
	FPR2	0.038026
	SMIM6	0.03809
	PPP1R8	0.038116
	WSB1	0.038116
	GPR158	0.038159
	DNAJC13	0.038284
	CRYGN	0.038286
	FANCF	0.038292
	OR51L1	0.03847
	PHYHD1	0.038539
	CCDC53	0.038609
	ARVCF	0.038692
	SLC9A3	0.038736
	EXOC1	0.038814
	TGFBR2	0.038891
	DPH6	0.038895
	MFGE8	0.038914
	PCDHGC5	0.038959
	ZMYM1	0.039002
	OXSR1	0.039003
	MAPK8IP3	0.039047
	ATP5H	0.039068
	TP53RK	0.039068
	NEB	0.039289
	PECR	0.039289
	C14orf79	0.039289
	PPIH	0.039289
	UHRF1BP1L	0.039289
	KCNV1	0.039289
	MTMR12	0.039289
	METAP1D	0.039289
	ITGB7	0.039358
	SLC35B1	0.039363
	PGD	0.039363
	C8G	0.039384
	DKKL1	0.039402
	NUDT19	0.039536
	GNPTG	0.03958
	ARF1	0.039602
	CST2	0.039602
	ST6GALNAC5	0.039611
	GPR20	0.039624
	PPP2R5C	0.039625
	GREB1	0.039669
	GP6	0.039739
	IRX1	0.039802
	TMEM258	0.039817
	UGT1A6	0.039824
	NHLH2	0.039825
	PRDX4	0.039891
	GAR1	0.039905
	SCAMP4	0.039935
	TEX35	0.039938
	HGFAC	0.039979
	IFI16	0.039988
	WNT3	0.040024
	ADAMTS3	0.040112
	TMEM252	0.040157
	KPNA1	0.04029
	HES2	0.040292
	OR6C3	0.040294
	TPRN	0.040334
	LOC100134391	0.040339
	CCDC129	0.040351
	BAAT	0.040378
	POLH	0.040394
	SELK	0.040403
	RAB23	0.040445
	ARID5A	0.040445
	THEMIS2	0.040528
	OR5W2	0.040556
	ADAMTS17	0.0406
	SPAG16	0.040777
	MLLT4	0.040799
	TWF1	0.040799
	PYCR1	0.040822
	EMC7	0.040864
	EIF3B	0.041006
	MUC15	0.041043
	NONO	0.041092
	NT5C3A	0.041136
	ZNF781	0.041142
	PARVG	0.041176
	ITIH1	0.041191
	SLC19A3	0.041221
	IRF2	0.041309
	GOSR1	0.041398
	USP39	0.041414
	FAM228B	0.041484
	KRTAP21-1	0.041511
	KCNK4	0.041557
	RTN4IP1	0.041557
	NUP43	0.041557
	CCDC146	0.041557
	HOOK3	0.041557
	TOP2A	0.041557
	SCG2	0.041557
	IFI44	0.041557
	PIGQ	0.041575
	DNAI2	0.041619
	PRRC2B	0.041708
	IGF2BP3	0.041725
	MOB4	0.041735
	TMEM131	0.041885
	RPSA	0.041905
	POLR1D	0.041905
	OR6C1	0.04197
	GPX8	0.04197
	ELANE	0.042018
	RTN4	0.042165
	MCMBP	0.04217
	CXXC5	0.042195
	SPRED1	0.042264
	ALDH7A1	0.042285
	DECR1	0.042372
	ARMC3	0.042456
	CMTM4	0.042599
	OR2F1	0.042615
	ZNF880	0.042615
	NSDHL	0.042621
	TRPC4AP	0.042658
	ARFRP1	0.042693
	MBD2	0.042701
	TAB2	0.042728
	POTEJ	0.042837
	GPR62	0.043036
	PRRX2	0.043052
	RBBP5	0.043058
	PPP1R12A	0.043058
	NPHP1	0.043059
	SLC25A3	0.043059
	SLC22A16	0.043124
	KIF21A	0.043168
	MORN4	0.043233
	NFRKB	0.043244
	LPAR4	0.043328
	LRRC10	0.043389
	MND1	0.043428
	PSG7	0.043428
	UBE2V1	0.043428
	PPP1R12C	0.043478
	MYL6B	0.043555
	OVCH1	0.043734
	SPICE1	0.043734
	C2orf47	0.043734
	STYK1	0.043734
	ADGB	0.043734
	DOCK1	0.043734
	NBN	0.043734
	CCDC102B	0.043734
	LYST	0.043734
	DFNB59	0.043734
	WDR43	0.043734
	RNF19A	0.043734
	SIRT1	0.043778
	ITPKC	0.043787
	TMEM200B	0.043831
	STK4	0.043876
	SRSF9	0.044008
	MRPL55	0.044096
	CCND2	0.044097
	HTR2A	0.044146
	FKBP3	0.04415
	FGFR2	0.044166
	KCTD9	0.044185
	PBDC1	0.044406
	LUZP4	0.04445
	FAM47A	0.044627
	CHN1	0.04471
	CD5	0.044759
	EDF1	0.044788
	FAM216A	0.044823
	GLRX	0.044847
	SF3A1	0.044885
	SLC22A10	0.044936
	ZNF648	0.045201
	APLP2	0.045265
	NDUFS1	0.045486
	MOB1A	0.045551
	FLJ45513	0.045567
	HAUS4	0.045626
	MAP3K3	0.045626
	CCDC125	0.045642
	RAPGEF6	0.04573
	GNG5	0.045781
	NM_1012706	0.045781
	TMEM246	0.045803
	HNRNPM	0.045803
	DAP3	0.045803
	ZNF730	0.045818
	PSMC4	0.045898
	RABAC1	0.045919
	ERVV-2	0.045952
	TSFM	0.045993
	LIPE	0.045993
	NUBP1	0.045993
	GNS	0.045993
	INPP1	0.045993
	TXNL1	0.045993
	OSBP	0.045993
	HERC1	0.045993
	GTF2E1	0.045993
	EPG5	0.045993
	TTC32	0.045993
	ABCB11	0.045993
	HGD	0.045993
	PCDHB3	0.045993
	ATAD5	0.045993
	FAM161A	0.045993
	FGD6	0.045993
	ASNSD1	0.045993
	WFS1	0.046083
	DYNC1LI2	0.046112
	TSLP	0.046112
	MEI4	0.046253
	OLFM2	0.046259
	RABEPK	0.04645
	ZASP	0.046453
	ANP32B	0.046453
	SLC14A2	0.04648
	APC2	0.046524
	TOR2A	0.046644
	TOPAZ1	0.046744
	PMCH	0.046864
	FH	0.046956
	RALGAPA2	0.046965
	SLC26A8	0.047009
	PKM	0.047059
	NAA11	0.047097
	RNF115	0.047222
	QRFPR	0.047229
	SAP18	0.04725
	TRRAP	0.047333
	CCT5	0.047369
	SLC5A11	0.047412
	MGLL	0.047492
	OR13F1	0.047537
	RFXAP	0.047556
	INTU	0.047581
	GCNT3	0.047625
	PSMD5	0.047744
	NLRP3	0.047757
	RND3	0.047802
	C7orf71	0.047838
	THUMPD1	0.047846
	GPR18	0.047978
	HMGN1	0.048034
	MAP3K4	0.048093
	INO80E	0.04811
	CLK2	0.048154
	NM_1171637	0.048168
	PLD4	0.048198
	CEP41	0.048233
[truncated: 16,612 more rows]
